# Supplementary material for: Does the intrinsic photocontrollable oxidase-mimicking activity of 2-aminoterephthalic acid dominate the activity of metal–organic frameworks?
Source: Royal Society of Chemistry journal article supplement (doi:10.1039/d1qi00319d), 2021-01-01
Supplement: d1qi00319d1.pdf [file d1qi00319d1.pdf]

## Supporting Information

### **Does Intrinsic Photocontrollable Oxidase-Mimicking Activity of 2-Aminoterephthalic Acid Dominate the Activity of Metal–Organic Framework?**

Ying Nian, Linpin Luo, Wenxin Zhu, Chengyuan Yang, Liang Zhang, Min Li,  
Wentao Zhang\*, Jianlong Wang\*

College of Food Science and Engineering, Northwest A&F University, Yangling  
712100, Shaanxi, China. E-mail: wanglong79@nwsuaf.edu.cn

**Equipments.**

UV-visible absorption spectra were obtained using a UV-2550 UV-vis spectrophotometer (Shimadzu, Japan). The image of field emission scanning electron microscope (SEM) was taken on an S-4800 (Hitachi, Japan). Powder X-ray diffraction (XRD) patterns were recorded on a powder diffractometer (Bruker D8 Advanced Diffractometer System, Germany) with a Cu K $\alpha$  (1.5418 Å) source. X-ray photoelectron spectroscopy (XPS) data were recorded on a Thermo Scientific ESCALAB 250 with an Al K $\alpha$  source (1486.6 eV).

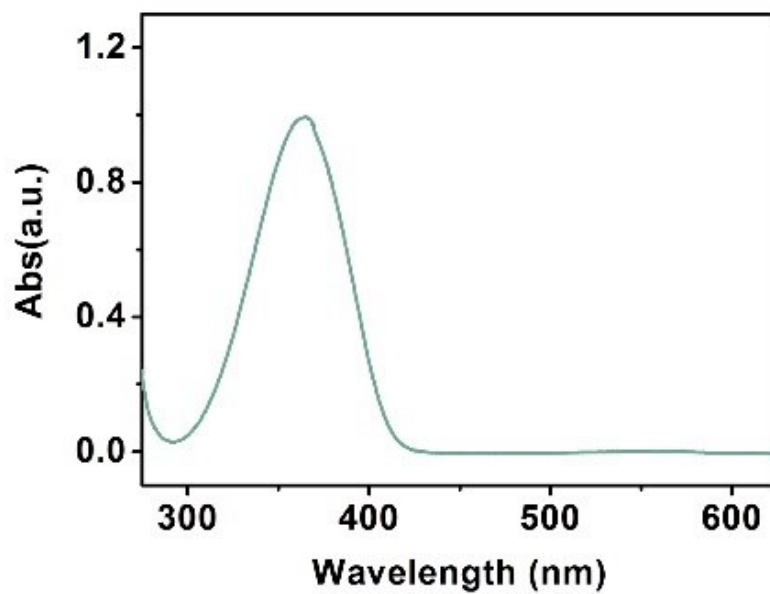

**Figure S1.** The UV-vis absorption spectrum of 2-Aminoterephthalic Acid (ATA).

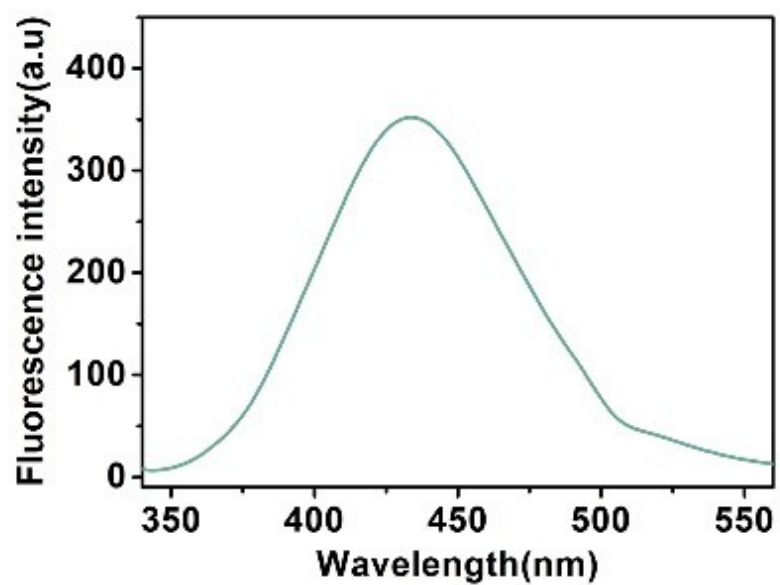

**Figure S2.** Photoluminescence (PL) spectrum of ATA.

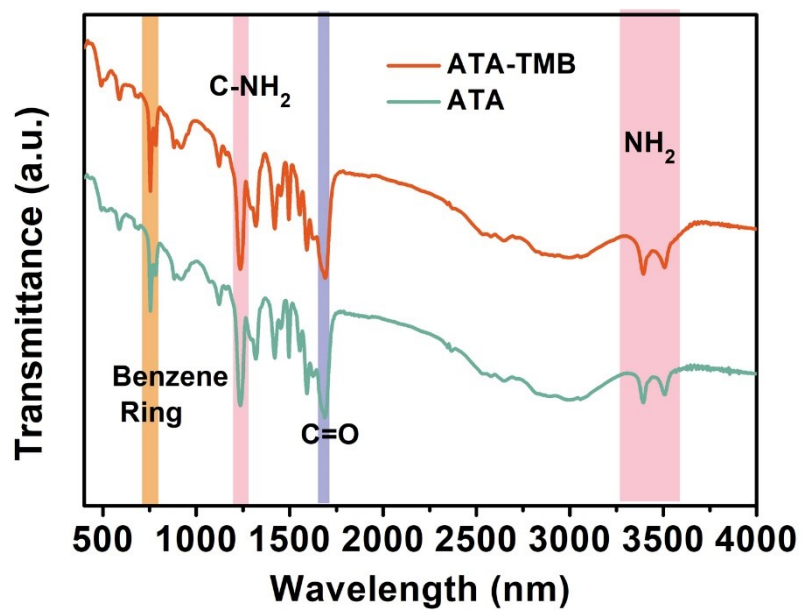

**Figure S3.** Fourier transform infrared spectroscopy (FTIR) spectra of ATA before and after oxidase-like catalytic reaction.

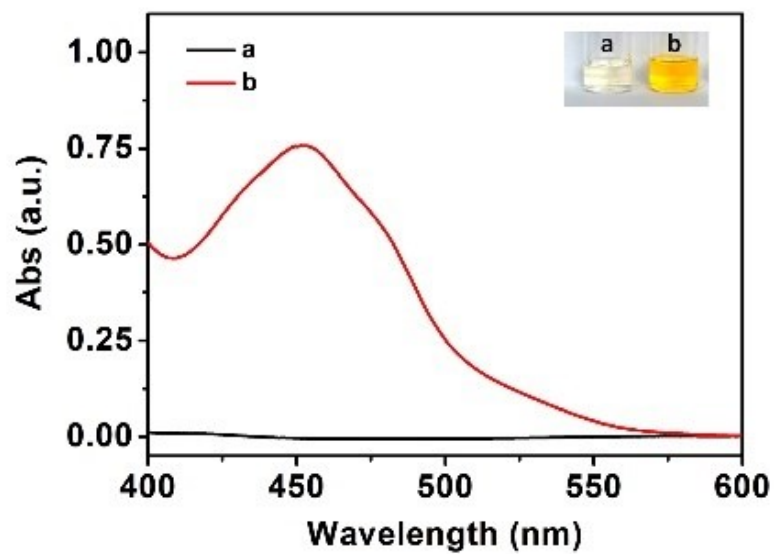

**Figure S4.** The UV-vis absorption spectra of different systems in acetate buffer solution (pH 3.0): a) OPD under light irradiation, b) ATA-OPD under light irradiation. Inset are the corresponding photographs.

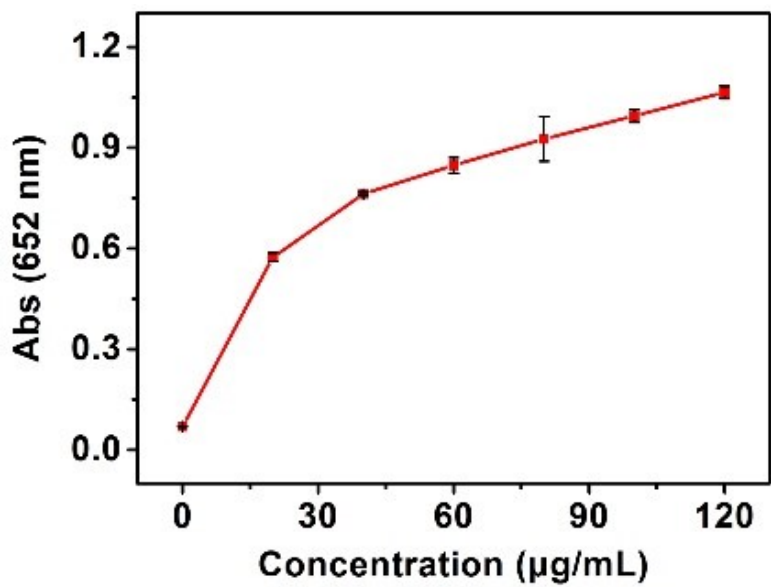

**Figure S5.** Relationship between catalytic activity and ATA concentration.

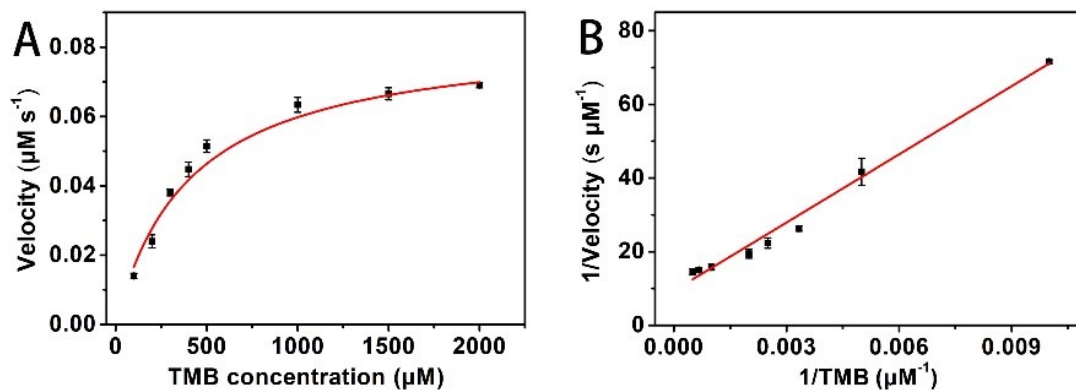

**Figure S6.** (A) Steady-state kinetic assays. The nonlinear fitting of Michaelis–Menten curves of ATA with TMB as substrate and (B) corresponding double-reciprocal plot.



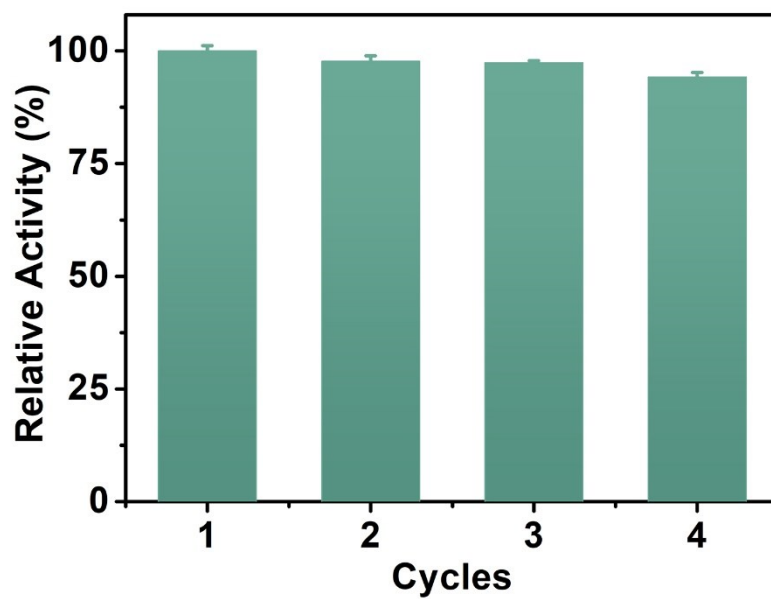

**Figure S7.** Photooxidase-like activity of ATA during repetitive cycles. Activity of 100% is set where absorbance is highest and the relative activities for others are calculated accordingly.

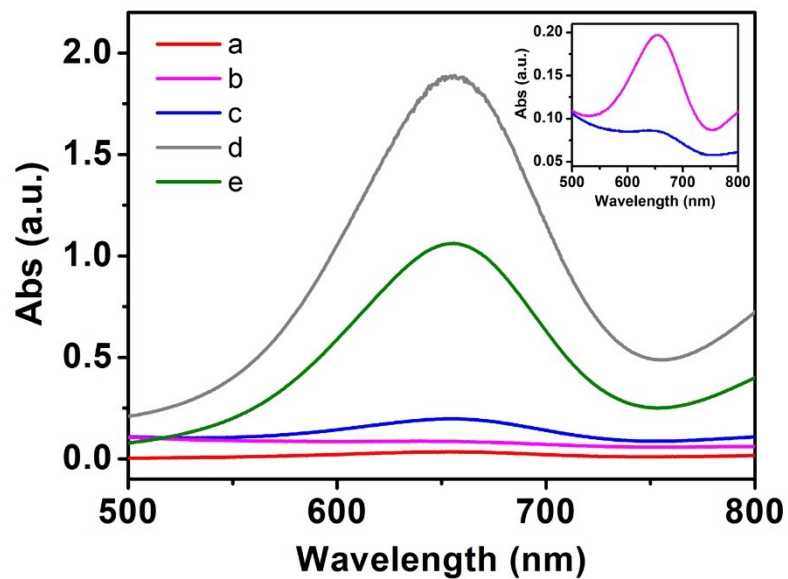

**Figure S8.** The UV absorption spectra of different system in acetate buffer solution (pH 3.0) with 5 min or 30 s (e)incubation (a-d): a) TMB under visible light irradiation, b) Al-MOF + TMB (no light irradiation), c) Al-MOF + TMB under UV light irradiation, d) Al-MOF + TMB under visible light irradiation, e) ATA + TMB under visble light irradiation. Inset: the closer view of b and c.

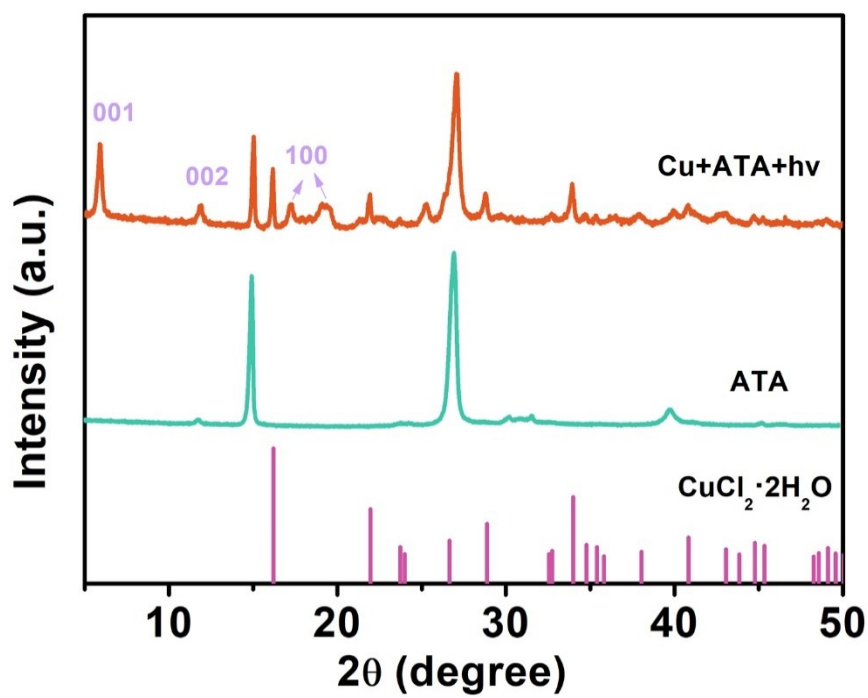

**Figure S9.** XRD pattern of  $\text{CuCl}_2 \cdot 2\text{H}_2\text{O}$ , ATA before and after incubation with  $\text{Cu}(\text{II})$  under light exposure.

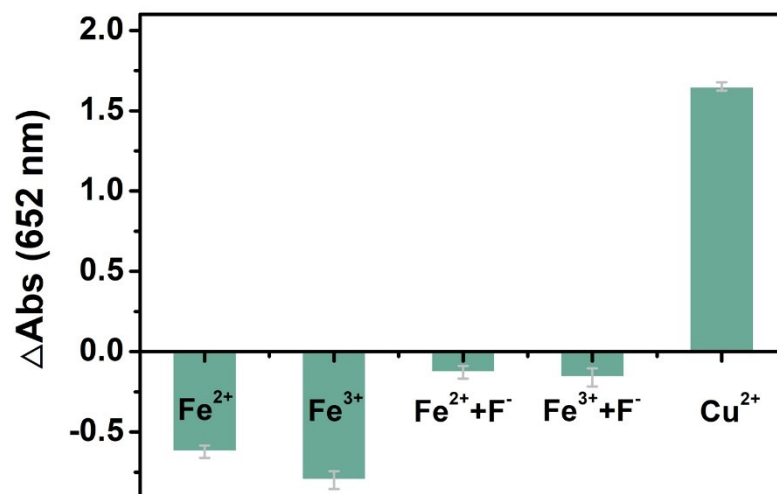

**Figure S10.** Selectivity test of Cu<sup>2+</sup> against Fe<sup>2+</sup> (50  $\mu\text{M}$ ) and Fe<sup>3+</sup> (12.5  $\mu\text{M}$ ) in the absence and presence of masking agent (F<sup>-</sup>).

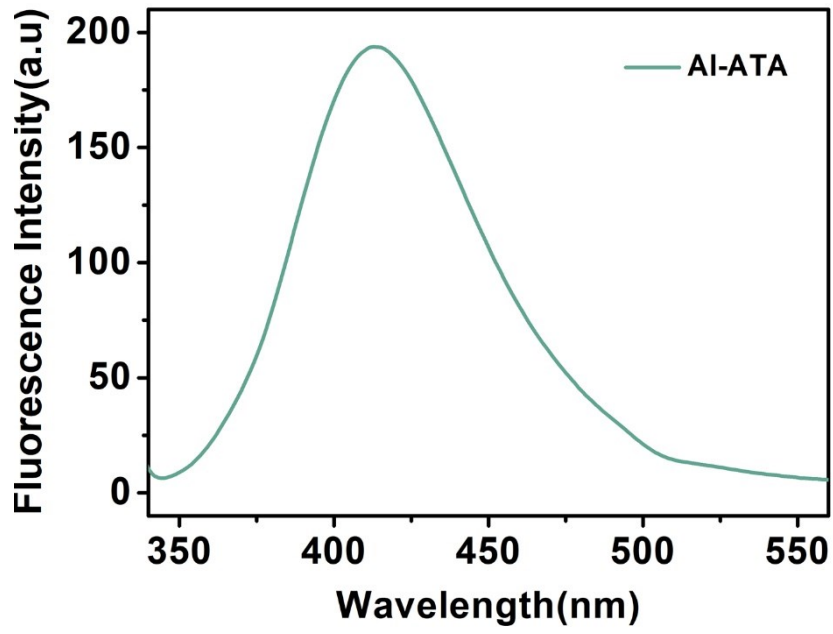

**Figure S11.** Fluorescence spectrum of the as-prepared Al-ATA

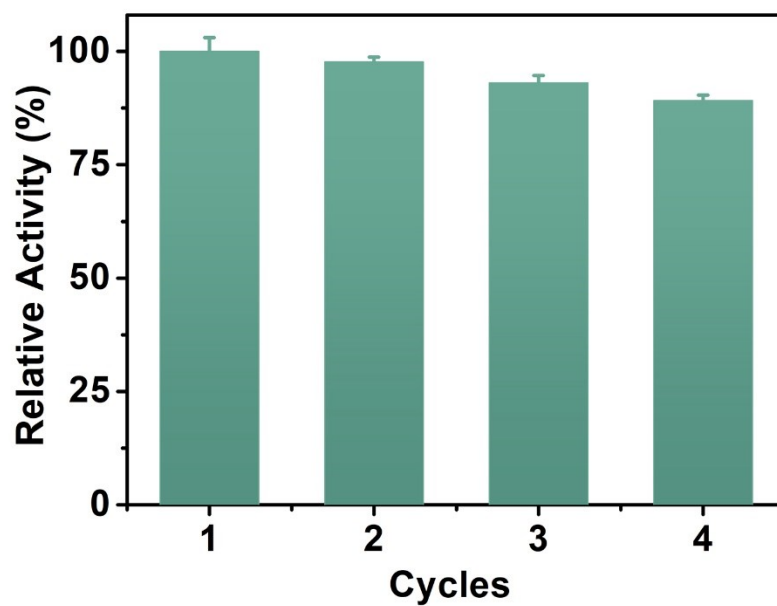

**Figure S12.** Photooxidase-like activity of Al-ATA during repetitive cycles. Activity of 100% is set where absorbance is highest and the relative activities for others are calculated accordingly.

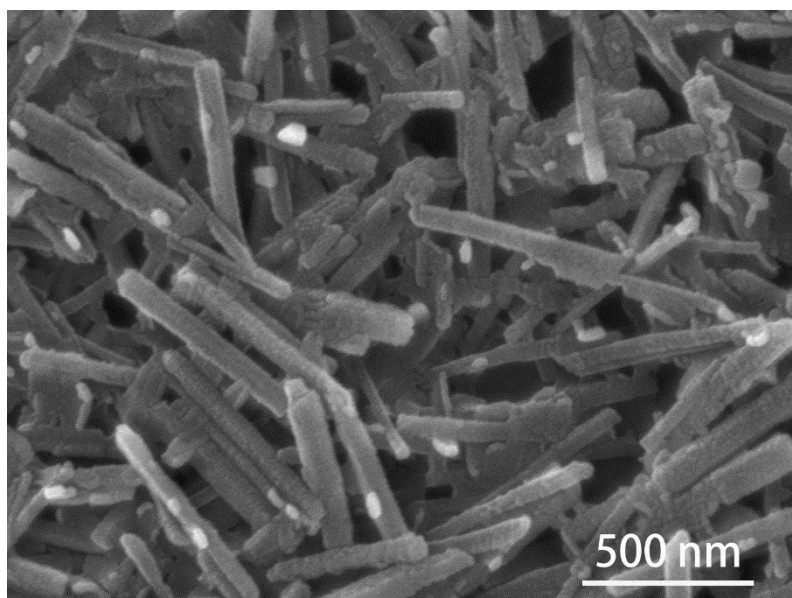

**Figure S13.** SEM of Al-MOF after catalytic oxidization of TMB.

**Table S1** Kinetics parameters of ATA and HRP with TMB as the substrate.

| Catalyst | $K_m$ (mM) | $V_{max}$ ( $10^{-8}$ M s $^{-1}$ ) | Ref.      |
|----------|------------|-------------------------------------|-----------|
| HRP      | 0.434      | 10                                  | 1         |
| ATA      | 0.407      | 8.41                                | This work |



## REFERENCE

1. L. Gao, J. Zhuang, L. Nie, J. Zhang, Y. Zhang, N. Gu, T. Wang, J. Feng, D. Yang, S. Perrett and X. Yan, Intrinsic Peroxidase-Like Activity of Ferromagnetic Nanoparticles, *Nat. Nanotechnol.*, 2007, **2**, 577-583.
